# Supplementary material for: Metabolic effects of agro-infiltration on N. benthamiana accessions
Source: Springer Nature journal article supplement (doi:10.1007/s11248-021-00256-9), 2021-04-28
Supplement: MOESM1 [file 11248_2021_256_MOESM1_ESM.pdf]

## Metabolic effects of agro-infiltration on *N. benthamiana* accessions

Margit Drapal, Eugenia M. A. Enfissi and Paul D. Fraser\*

Department of Biological Sciences, Royal Holloway University of London, Egham, United Kingdom

\*Corresponding author: [P.Fraser@rhul.ac.uk](mailto:P.Fraser@rhul.ac.uk), Tel: +44 1784 443555

**Supplementary Figure 1.** Heatmaps of untargeted (A) and identified (B) metabolite data of control plants of *N. benthamiana* NWA, WA, QLD and RA4.

**Supplementary Figure 2.** Heatmap of molecular features significantly different between leaf conditions.

**Supplementary Figure 3.** Heatmaps of primary (A) and secondary (B) metabolites in agroinfiltrated and control leaves.

**Supplementary Table 1.** LC-MS metabolite profiling – untargeted data of control plants of *N. benthamiana* NWA, WA, QLD and RA4.

**Supplementary Table 2.** LC-MS metabolite profiling – untargeted data of agroinfiltrated plants of *N. benthamiana* NWA, WA, QLD and RA4.

**Supplementary Table 3.** Levels of identified metabolites in agroinfiltrated and control leaves.

**Supplementary Table 4.** Metabolite library of *N. benthamiana* accessions.

# Supplementary Figure 1.

**A**

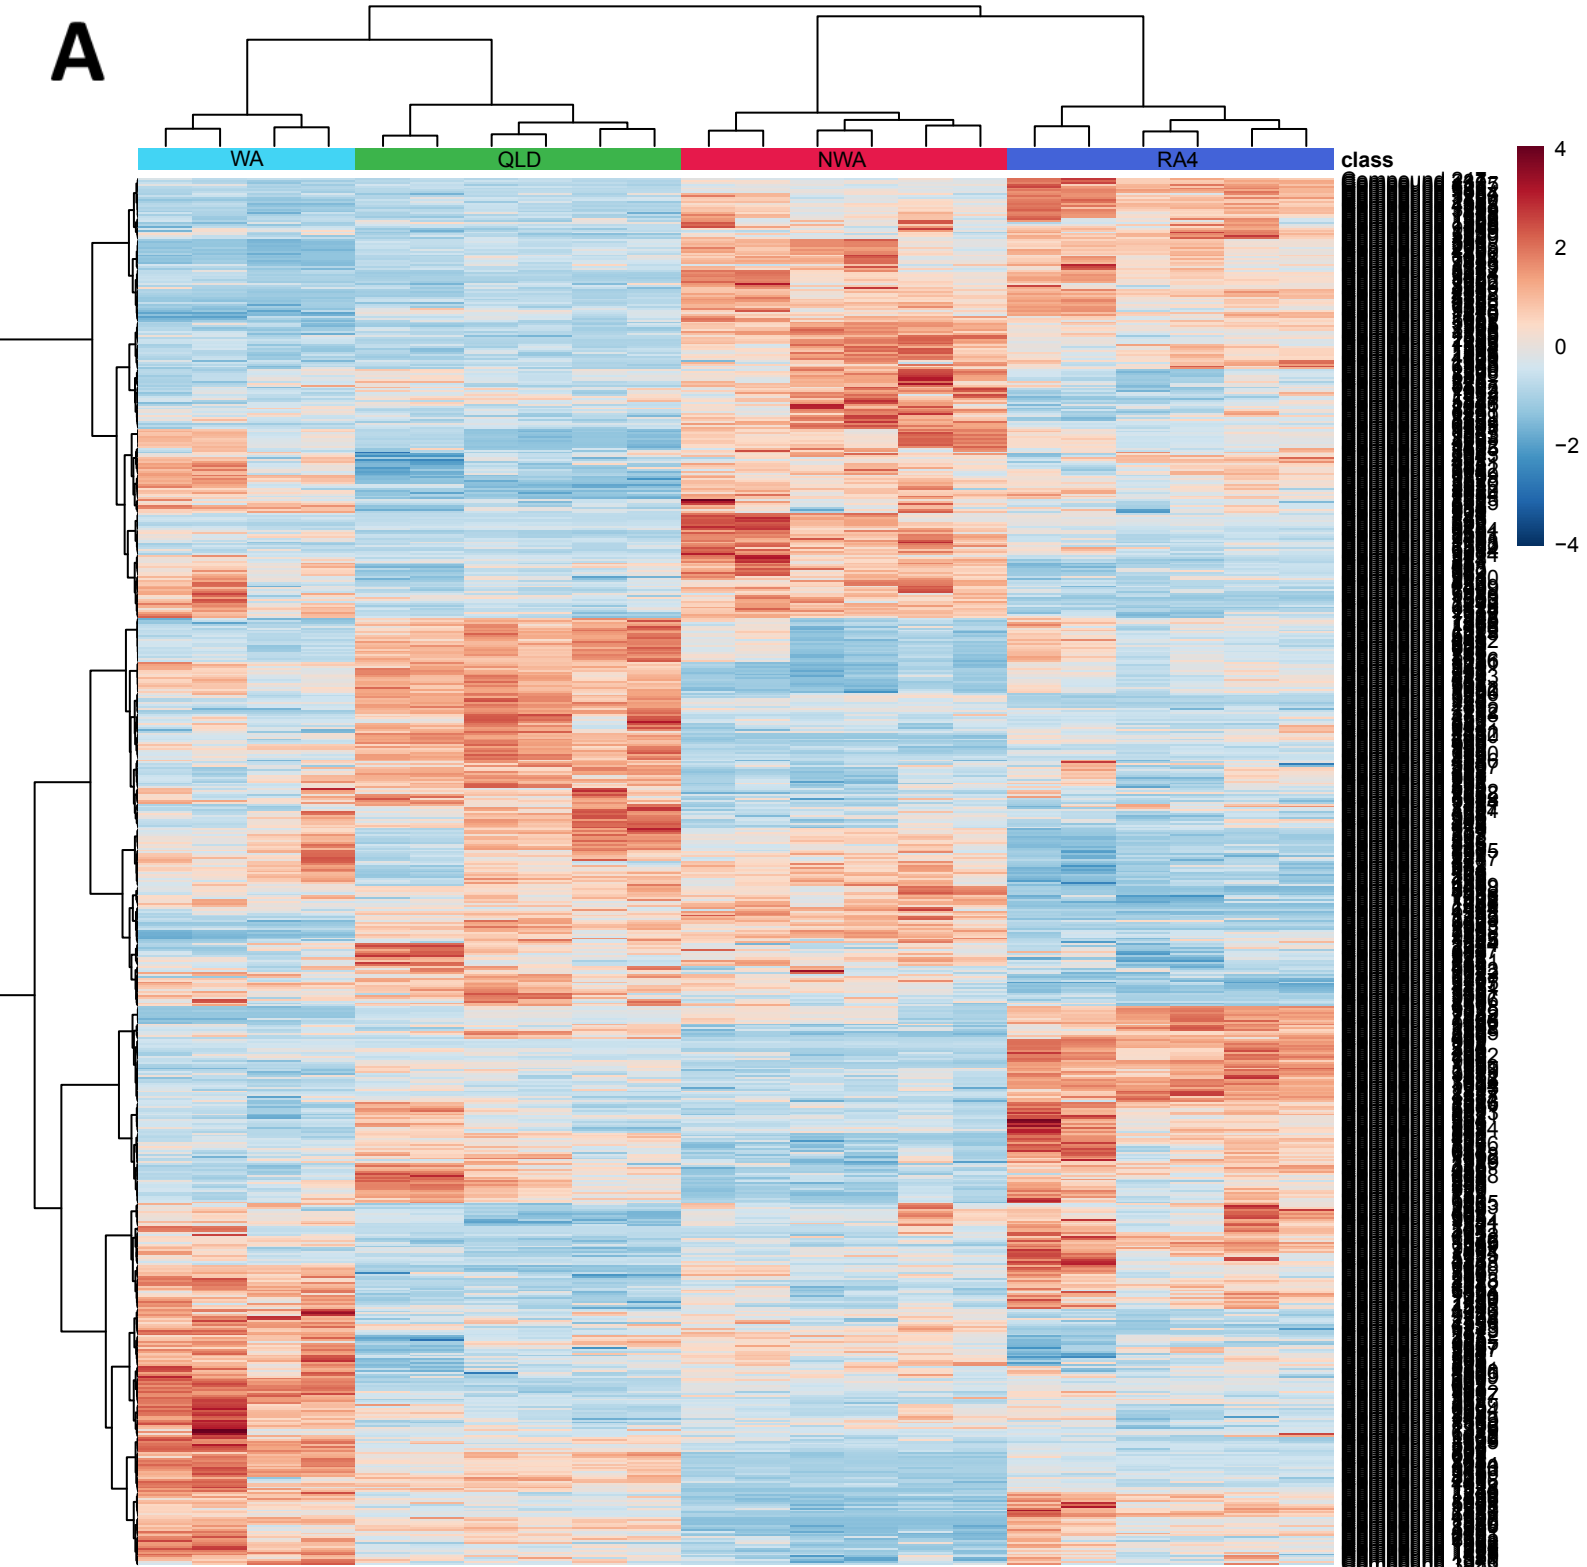

**B**

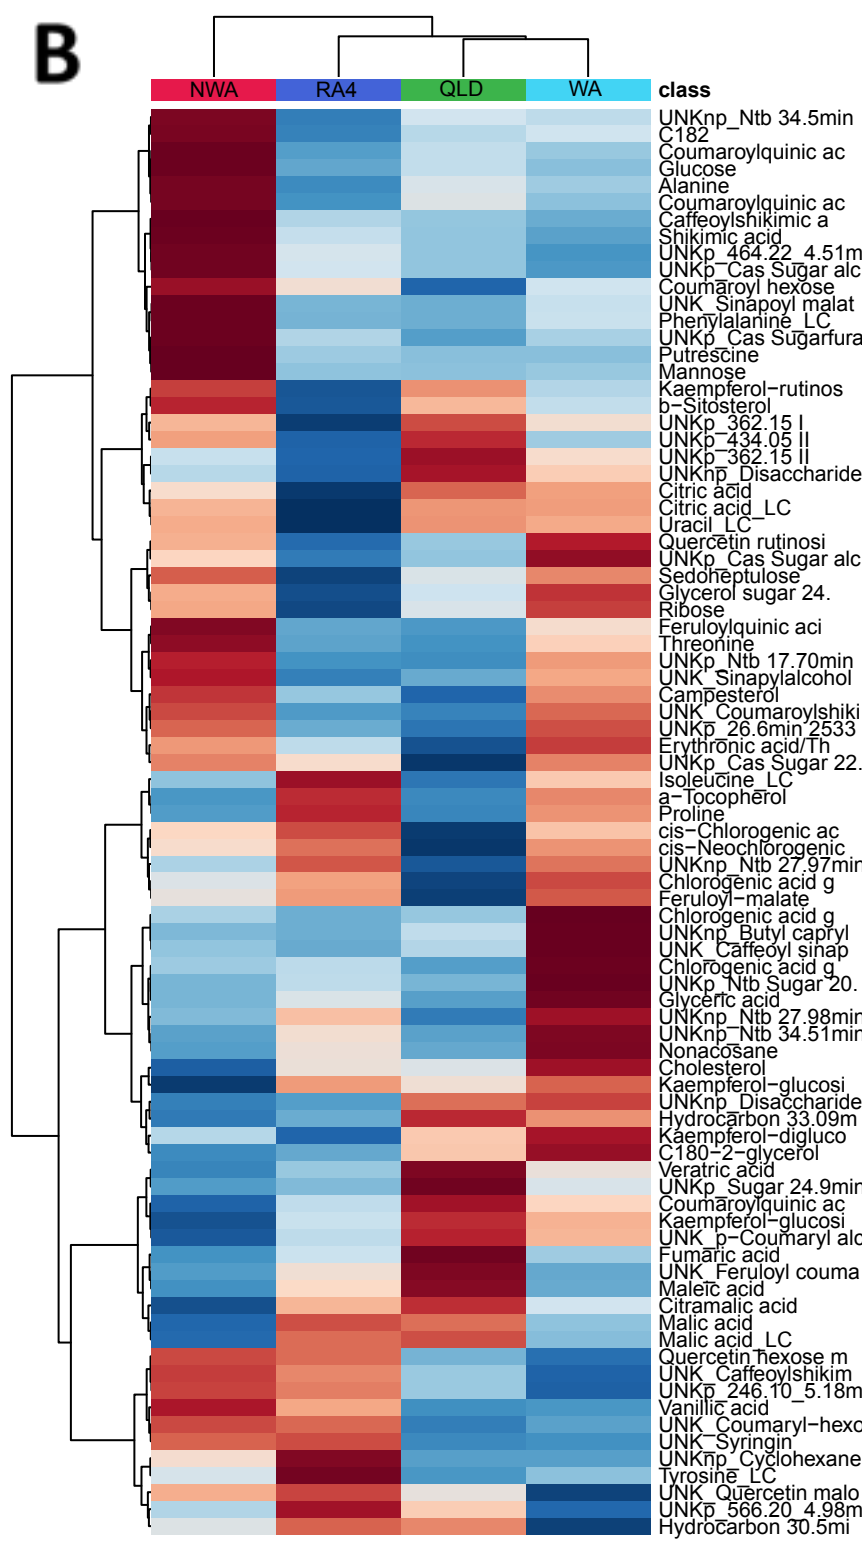



# Supplementary Figure 3.

## A

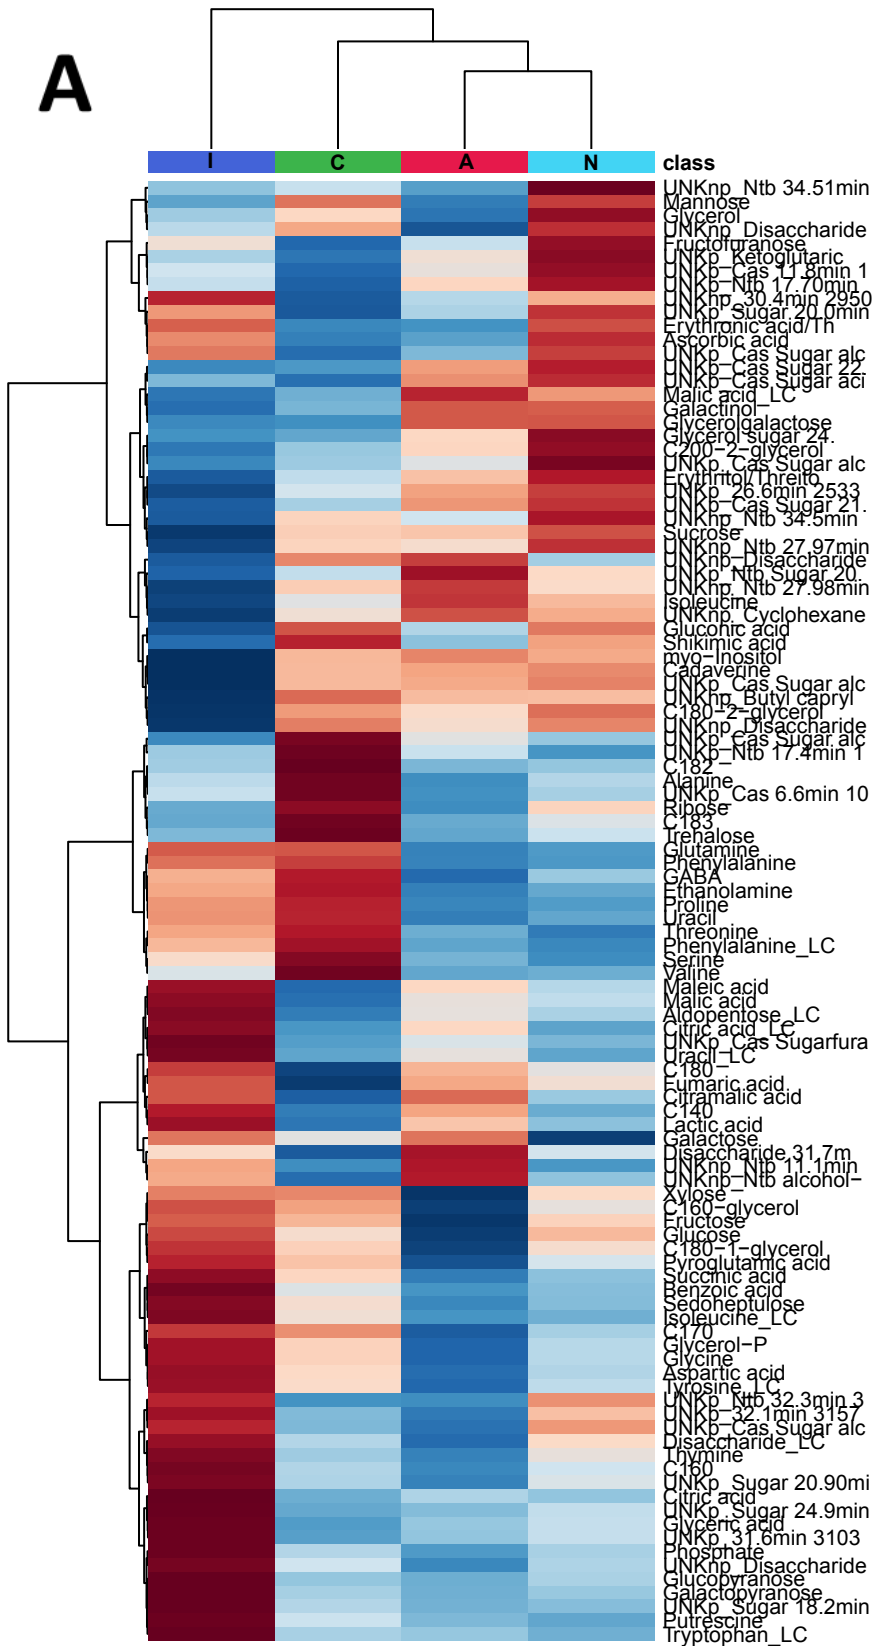

## B

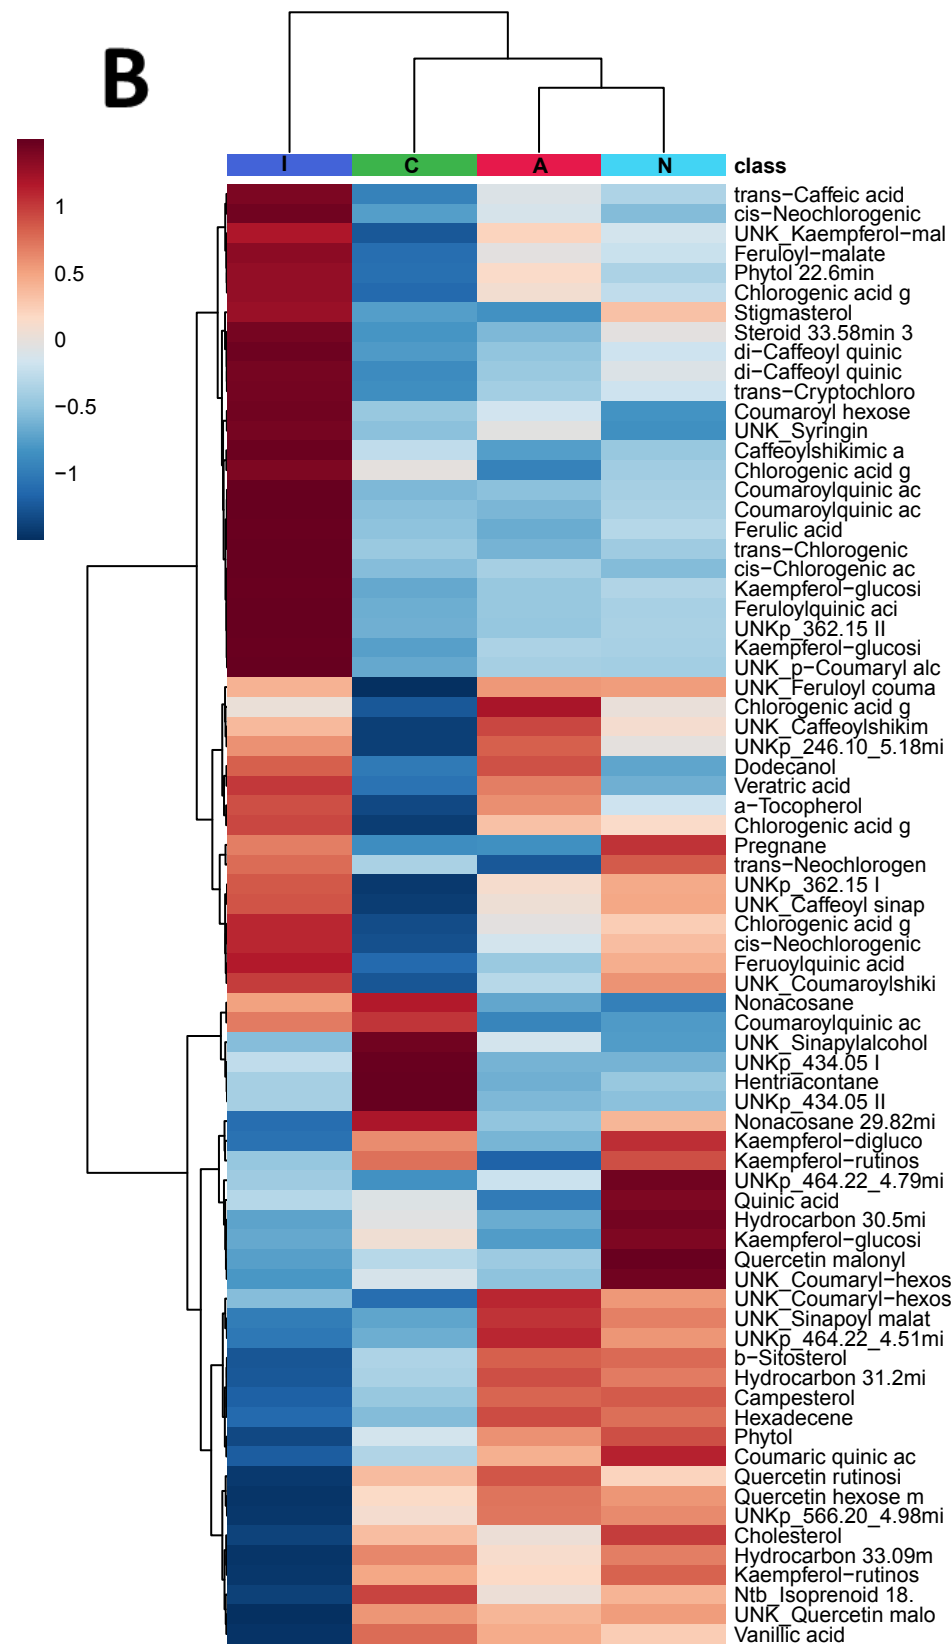

| a   | Metabolites                                   | Analytical platform | Identification features<br>(retention time (RT) in min.) |            |            |                                | Identification |                    |                       |                 |
|-----|-----------------------------------------------|---------------------|----------------------------------------------------------|------------|------------|--------------------------------|----------------|--------------------|-----------------------|-----------------|
|     |                                               |                     | RT (GC/MS)                                               | RI (GC/MS) | RT (LC/MS) | m/z [M-H] <sup>-</sup> (LC/MS) | Extract        | Level <sup>c</sup> | Standard <sup>d</sup> | Compound class  |
| 1   | Fructofuranose                                | GCMS                | 18.13                                                    | 1794.6     |            |                                | Polar          | 3                  | No                    | Sugar           |
| 2   | Fructose                                      | GCMS                | 18.53                                                    | 1824.3     |            |                                | Polar          | 1                  | Yes                   | Sugar           |
| 3   | Galactinol                                    | GCMS                | 30.55                                                    | 2972.4     |            |                                | Polar          | 1                  | Yes                   | Sugar alcohol   |
| 4   | Galactopyranose                               | GCMS                | 19.32                                                    | 1884.5     |            |                                | Polar          | 1                  | Yes                   | Sugar           |
| 5   | Galactose                                     | GCMS                | 19.22                                                    | 1877.0     |            |                                | Polar          | 1                  | Yes                   | Sugar           |
| 6   | Gluconic acid                                 | GCMS                | 20.65                                                    | 1990.9     |            |                                | Polar          | 1                  | Yes                   | Sugar acid      |
| 7   | Glucopyranose                                 | GCMS                | 20.41                                                    | 1972.0     |            |                                | Polar          | 3                  | No                    | Sugar           |
| 8   | Glucose                                       | GCMS                | 19.66                                                    | 1911.1     |            |                                | Polar          | 1                  | Yes                   | Sugar           |
| 9   | Mannose                                       | GCMS                | 18.73                                                    | 1839.5     |            |                                | Polar          | 1                  | Yes                   | Sugar           |
| 10  | myo-Inositol                                  | GCMS                | 21.74                                                    | 2082.3     |            |                                | Polar          | 1                  | Yes                   | Sugar           |
| 11  | Ribose                                        | GCMS                | 16.38                                                    | 1667.9     |            |                                | Polar          | 1                  | Yes                   | Sugar           |
| 12  | Sedoheptulose                                 | GCMS                | 22.11                                                    | 2118.7     |            |                                | Polar          | 1                  | Yes                   | Sugar           |
| 13  | Xylose                                        | GCMS                | 16.06                                                    | 1646.3     |            |                                | Polar          | 1                  | Yes                   | Sugar           |
| 14  | LC_Aldopentose                                | LCMS                |                                                          |            | 0.74       | 194.06                         | Polar          | 3                  | No                    | Sugar           |
| 15  | UNKp_Sugar 21.9min                            | GCMS                | 21.93                                                    | 2098.1     |            |                                | Polar          | 3                  | No                    | Sugar           |
| 16  | UNKp_Sugar 22.7min                            | GCMS                | 22.71                                                    | 2166.5     |            |                                | Polar          | 3                  | No                    | Sugar           |
| 17  | UNKp_Sugar acid 17.4min                       | GCMS                | 17.44                                                    | 1744.3     |            |                                | Polar          | 3                  | No                    | Sugar acid      |
| 18  | UNKp_Sugar alcohol 15.4min                    | GCMS                | 15.44                                                    | 1603.0     |            |                                | Polar          | 3                  | No                    | Sugar alcohol   |
| 19  | UNKp_Sugar alcohol 16.7min                    | GCMS                | 16.68                                                    | 1688.8     |            |                                | Polar          | 3                  | No                    | Sugar alcohol   |
| 20  | UNKp_Sugar alcohol 16.98min                   | GCMS                | 16.99                                                    | 1711.1     |            |                                | Polar          | 3                  | No                    | Sugar alcohol   |
| 21  | UNKp_Sugar alcohol 17.1min                    | GCMS                | 17.06                                                    | 1716.5     |            |                                | Polar          | 3                  | No                    | Sugar           |
| 22  | UNKp_Sugar alcohol 19.8min                    | GCMS                | 19.79                                                    | 1921.9     |            |                                | Polar          | 3                  | No                    | Sugar alcohol   |
| 23  | UNKp_Sugarfuranose 17.6min                    | GCMS                | 17.63                                                    | 1758.0     |            |                                | Polar          | 3                  | No                    | Sugar           |
| 24  | UNKp_Sugar 20.3min                            | GCMS                | 20.26                                                    | 1959.5     |            |                                | Polar          | 3                  | No                    | Sugar           |
| 25  | UNKp_Sugar 18.2min                            | GCMS                | 18.05                                                    | 1785.4     |            |                                | Polar          | 3                  | No                    | Sugar           |
| 26  | UNKp_Sugar 20.0min                            | GCMS                | 19.97                                                    | 1935.3     |            |                                | Polar          | 3                  | No                    | Sugar           |
| 27  | UNKp_Sugar 20.9min                            | GCMS                | 20.84                                                    | 2005.8     |            |                                | Polar          | 3                  | No                    | Sugar           |
| 28  | UNKp_Sugar 24.9min                            | GCMS                | 24.87                                                    | 2365.1     |            |                                | Polar          | 3                  | No                    | Sugar           |
| 29  | Sucrose                                       | GCMS                | 26.87                                                    | 2563.7     |            |                                | Polar          | 1                  | Yes                   | Sugar           |
| 30  | Trehalose                                     | GCMS                | 28.47                                                    | 2734.9     |            |                                | Polar          | 1                  | Yes                   | Sugar           |
| 31  | Disaccharide 31.7min                          | GCMS                | 31.70                                                    | 3107.0     |            |                                | Polar          | 3                  | No                    | Sugar           |
| 32  | LC_Disaccharide                               | LCMS                |                                                          |            | 0.69       | 341.12                         | Polar          | 3                  | No                    | Sugar           |
| 33  | Citric acid                                   | LCMS/GCMS           | 18.32                                                    | 1808.7     | 0.86       | 191.03                         | Polar          | 1                  | Yes                   | TCA cycle       |
| 35  | Ketoglutaric acid                             | GCMS                | 18.54                                                    | 1827.2     |            |                                | Polar          | 1                  | Yes                   | TCA cycle       |
| 36  | Succinic acid                                 | GCMS                | 10.69                                                    | 1301.4     |            |                                | Polar          | 1                  | Yes                   | TCA cycle       |
| 37  | Fumaric acid                                  | GCMS                | 11.39                                                    | 1345.3     |            |                                | Polar          | 1                  | Yes                   | TCA cycle       |
| 38  | Maleic acid                                   | GCMS                | 10.62                                                    | 1299.1     |            |                                | Polar          | 1                  | Yes                   | TCA cycle       |
| 39  | Malic acid                                    | LCMS/GCMS           | 13.62                                                    | 1482.8     | 0.72       | 133.02                         | Polar          | 1                  | Yes                   | TCA cycle       |
| 41  | Citramalic acid                               | GCMS                | 13.19                                                    | 1456.1     |            |                                | Polar          | 1                  | Yes                   | TCA cycle       |
| 42  | Erythritol/Threitol                           | GCMS                | 13.89                                                    | 1500.1     |            |                                | Polar          | 2                  | No                    | Cell wall       |
| 43  | Erythronic acid/Threonic acid                 | GCMS                | 14.21                                                    | 1521.4     |            |                                | Polar          | 1                  | Yes                   | Sugar acid      |
| 44  | Ethanolamine                                  | GCMS                | 10.03                                                    | 1264.5     |            |                                | Polar          | 1                  | Yes                   | Other           |
| 45  | Glyceric acid                                 | GCMS                | 11.05                                                    | 1324.9     |            |                                | Polar          | 1                  | Yes                   | Sugar acid      |
| 46  | Glycerol                                      | GCMS                | 10.10                                                    | 1269.0     |            |                                | Polar          | 1                  | Yes                   | Cell wall       |
| 47  | Glycerol sugar 24.6min                        | GCMS                | 24.60                                                    | 2343.2     |            |                                | Polar          | 2                  | No                    | Glyceride       |
| 48  | Galactosylglycerol                            | GCMS                | 24.18                                                    | 2299.1     |            |                                | Polar          | 1                  | Yes                   | Glyceride       |
| 49  | Glycerol-3-phosphate                          | GCMS                | 16.97                                                    | 1709.5     |            |                                | Polar          | 1                  | Yes                   | Glyceride       |
| 50  | C14:0                                         | GCMS                | 18.62                                                    | 1832.0     |            |                                | Non-polar      | 1                  | Yes                   | Fatty acid      |
| 51  | C16:0                                         | GCMS                | 21.13                                                    | 2034.1     |            |                                | Non-polar      | 1                  | Yes                   | Fatty acid      |
| 52  | C16:0-glycerol                                | GCMS                | 26.90                                                    | 2571.3     |            |                                | Non-polar      | 1                  | Yes                   | Fatty acid      |
| 53  | C17:0                                         | GCMS                | 21.93                                                    | 2099.2     |            |                                | Non-polar      | 1                  | Yes                   | Fatty acid      |
| 54  | C18:0                                         | GCMS                | 23.38                                                    | 2225.9     |            |                                | Non-polar      | 1                  | Yes                   | Fatty acid      |
| 55  | C18:0-1-glycerol                              | GCMS                | 28.67                                                    | 2769.8     |            |                                | Non-polar      | 1                  | Yes                   | Fatty acid      |
| 56  | C18:0-2-glycerol                              | GCMS                | 28.66                                                    | 2755.9     |            |                                | Non-polar      | 1                  | Yes                   | Fatty acid      |
| 57  | C18:2                                         | GCMS                | 23.02                                                    | 2193.0     |            |                                | Non-polar      | 1                  | Yes                   | Fatty acid      |
| 58  | C18:3                                         | GCMS                | 23.15                                                    | 2203.2     |            |                                | Non-polar      | 1                  | Yes                   | Fatty acid      |
| 59  | C20:0-2-glycerol                              | GCMS                | 30.38                                                    | 2952.5     |            |                                | Non-polar      | 1                  | Yes                   | Fatty acid      |
| 60  | Dodecanol                                     | GCMS                | 14.70                                                    | 1553.9     |            |                                | Non-polar      | 1                  | Yes                   | Hydrocarbon     |
| 61  | Hentriacotane                                 | GCMS                | 31.50                                                    | 3086.1     |            |                                | Non-polar      | 1                  | Yes                   | Hydrocarbon     |
| 62  | Hexadecene                                    | GCMS                | 18.59                                                    | 1829.2     |            |                                | Non-polar      | 1                  | Yes                   | Hydrocarbon     |
| 63  | Hydrocarbon 30.5min                           | GCMS                | 30.50                                                    | 2960.4     |            |                                | Non-polar      | 3                  | No                    | Hydrocarbon     |
| 64  | Hydrocarbon 31.2min                           | GCMS                | 31.20                                                    | 3049.5     |            |                                | Non-polar      | 3                  | No                    | Hydrocarbon     |
| 65  | Hydrocarbon 33.09min                          | GCMS                | 33.09                                                    | 3272.8     |            |                                | Non-polar      | 3                  | No                    | Hydrocarbon     |
| 66  | Nonacosane                                    | GCMS                | 29.48                                                    | 2849.0     |            |                                | Non-polar      | 1                  | Yes                   | Hydrocarbon     |
| 67  | Nonacosane 29.82min                           | GCMS                | 29.82                                                    | 2885.5     |            |                                | Non-polar      | 2                  | No                    | Hydrocarbon     |
| 68  | Cholesterol                                   | GCMS                | 31.92                                                    | 3135.6     |            |                                | Non-polar      | 1                  | Yes                   | Sterol          |
| 69  | Campesterol                                   | GCMS                | 32.77                                                    | 3236.1     |            |                                | Non-polar      | 1                  | Yes                   | Sterol          |
| 70  | b-Sitosterol                                  | GCMS                | 33.45                                                    | 3317.7     |            |                                | Non-polar      | 1                  | Yes                   | Sterol          |
| 71  | Stigmasterol                                  | GCMS                | 32.97                                                    | 3260.2     |            |                                | Non-polar      | 1                  | Yes                   | Sterol          |
| 72  | UNKnp_Pregnane                                | GCMS                | 18.73                                                    | 1839.7     |            |                                | Non-polar      | 3                  | No                    | Sterol          |
| 73  | Steroid 33.58min 3333                         | GCMS                | 33.58                                                    | 3333.0     |            |                                | Non-polar      | 3                  | No                    | Sterol          |
| 74  | a-Tocopherol                                  | GCMS                | 31.79                                                    | 3120.5     |            |                                | Non-polar      | 1                  | Yes                   | Isoprenoid      |
| 75  | Ntb_Isoprenoid 18.6min                        | GCMS                | 18.86                                                    | 1865.6     |            |                                | Non-polar      | 3                  | No                    | Isoprenoid      |
| 76  | Phytol                                        | GCMS                | 18.53                                                    | 1824.1     |            |                                | Non-polar      | 1                  | Yes                   | Isoprenoid      |
| 77  | Phytol 22.6min                                | GCMS                | 22.58                                                    | 2155.7     |            |                                | Non-polar      | 2                  | No                    | Isoprenoid      |
| 78  | Alanine                                       | GCMS                | 7.40                                                     | 1109.5     |            |                                | Polar          | 1                  | Yes                   | Amino acid      |
| 79  | Aspartic acid                                 | GCMS                | 14.09                                                    | 1513.1     |            |                                | Polar          | 1                  | Yes                   | Amino acid      |
| 80  | Cadaverine                                    | GCMS                | 8.10                                                     | 1148.5     |            |                                | Polar          | 1                  | Yes                   | Amino acid      |
| 81  | GABA                                          | GCMS                | 14.24                                                    | 1523.4     |            |                                | Polar          | 1                  | Yes                   | Amino acid      |
| 82  | Glutamine                                     | GCMS                | 17.73                                                    | 1764.9     |            |                                | Polar          | 1                  | Yes                   | Amino acid      |
| 83  | Glycine                                       | GCMS                | 10.69                                                    | 1302.8     |            |                                | Polar          | 1                  | Yes                   | Amino acid      |
| 84  | Isoleucine                                    | LCMS/GCMS           | 10.46                                                    | 1289.4     | 0.96       | 130.09                         | Polar          | 1                  | Yes                   | Amino acid      |
| 86  | Phenylalanine                                 | LCMS/GCMS           | 15.52                                                    | 1608.7     | 2.38       | 164.08                         | Polar          | 1                  | Yes                   | Amino acid      |
| 88  | Proline                                       | GCMS                | 10.55                                                    | 1294.4     |            |                                | Polar          | 1                  | Yes                   | Amino acid      |
| 89  | Putrescine                                    | GCMS                | 17.25                                                    | 1730.0     |            |                                | Polar          | 1                  | Yes                   | Amino acid      |
| 90  | Pyroglutamic acid <sup>b</sup>                | GCMS                | 14.11                                                    | 1514.7     |            |                                | Polar          | 1                  | Yes                   | Amino acid      |
| 91  | Serine                                        | GCMS                | 11.56                                                    | 1355.2     |            |                                | Polar          | 1                  | Yes                   | Amino acid      |
| 92  | Threonine                                     | GCMS                | 11.96                                                    | 1379.5     |            |                                | Polar          | 1                  | Yes                   | Amino acid      |
| 94  | Tryptophan                                    | LCMS                |                                                          |            | 3.66       | 203.09                         | Polar          | 1                  | Yes                   | Amino acid      |
| 95  | Tyrosine                                      | LCMS                |                                                          |            | 1.51       | 180.08                         | Polar          | 1                  | Yes                   | Amino acid      |
| 96  | Valine                                        | GCMS                | 9.19                                                     | 1215.0     |            |                                | Polar          | 1                  | Yes                   | Amino acid      |
| 97  | Shikimic acid                                 | GCMS                | 18.20                                                    | 1799.2     |            |                                | Polar          | 1                  | Yes                   | Phenylpropanoid |
| 98  | Quinic acid                                   | LCMS                |                                                          |            | 0.92       | 191.06                         | Polar          | 1                  | Yes                   | Phenylpropanoid |
| 99  | trans-Caffeic acid                            | GCMS                | 22.22                                                    | 2123.4     |            |                                | Polar          | 1                  | Yes                   | Phenylpropanoid |
| 100 | Caffeoylshikimic acid                         | LCMS                |                                                          |            | 4.07       | 335.08                         | Polar          | 2                  | No                    | Phenylpropanoid |
| 101 | di-Caffeoyl quinic acid                       | LCMS                |                                                          |            | 3.07       | 515.15                         | Polar          | 2                  | No                    | Phenylpropanoid |
| 102 | di-Caffeoyl quinic acid (3,5-di-CQA)          | LCMS                |                                                          |            | 3.38       | 515.15                         | Polar          | 2                  | No                    | Phenylpropanoid |
| 103 | UNK_Caffeoyl sinapoyl quinic acid             | LCMS                |                                                          |            | 5.62       | 559.09                         | Polar          | 2                  | No                    | Phenylpropanoid |
| 104 | UNK_Caffeoylshikimic acid                     | LCMS                |                                                          |            | 5.18       | 335.07                         | Polar          | 2                  | No                    | Phenylpropanoid |
| 105 | Chlorogenic acid glycoside I                  | LCMS                |                                                          |            | 5.44       | 515.13                         | Polar          | 2                  | No                    | Phenylpropanoid |
| 106 | Chlorogenic acid glycoside II                 | LCMS                |                                                          |            | 5.62       | 515.13                         | Polar          | 2                  | No                    | Phenylpropanoid |
| 107 | Chlorogenic acid glycoside III                | LCMS                |                                                          |            | 5.73       | 515.13                         | Polar          | 2                  | No                    | Phenylpropanoid |
| 108 | Chlorogenic acid glycoside IV                 | LCMS                |                                                          |            | 5.85       | 515.13                         | Polar          | 2                  | No                    | Phenylpropanoid |
| 109 | Chlorogenic acid glycoside V                  | LCMS                |                                                          |            | 6.01       | 515.18                         | Polar          | 2                  | No                    | Phenylpropanoid |
| 110 | cis-Chlorogenic acid                          | LCMS                |                                                          |            | 3.96       | 353.09                         | Polar          | 1                  | Yes                   | Phenylpropanoid |
| 111 | cis-Neochlorogenic acid                       | LCMS                |                                                          |            | 2.66       | 353.09                         | Polar          | 1                  | Yes                   | Phenylpropanoid |
| 112 | cis-Neochlorogenic acid II                    | LCMS                |                                                          |            | 3.25       | 353.09                         | Polar          | 1                  | Yes                   | Phenylpropanoid |
| 113 | trans-Chlorogenic acid                        | LCMS                |                                                          |            | 3.41       | 353.09                         | Polar          | 1                  | Yes                   | Phenylpropanoid |
| 114 | trans-Cryptochlorogenic acid                  | LCMS                |                                                          |            | 3.59       | 353.09                         | Polar          | 1                  | Yes                   | Phenylpropanoid |
| 115 | trans-Neochlorogenic acid                     | LCMS                |                                                          |            | 2.51       | 353.09                         | Polar          | 1                  | Yes                   | Phenylpropanoid |
| 116 | Coumaric quinic acid (CoQ)                    | LCMS                |                                                          |            | 3.24       | 337.10                         | Polar          | 2                  | No                    | Phenylpropanoid |
| 117 | Coumaroyl hexose                              | LCMS                |                                                          |            | 3.51       | 325.10                         | Polar          | 2                  | No                    | Phenylpropanoid |
| 118 | Coumaroylquinic acid                          | LCMS                |                                                          |            | 4.88       | 337.10                         | Polar          | 2                  | No                    | Phenylpropanoid |
| 119 | Coumaroylquinic acid (4-CoQA)                 | LCMS                |                                                          |            | 4.05       | 337.10                         | Polar          | 2                  | No                    | Phenylpropanoid |
| 120 | Coumaroylquinic acid (5-CoQA)                 | LCMS                |                                                          |            | 4.56       | 337.10                         | Polar          | 2                  | No                    | Phenylpropanoid |
| 121 | UNK_Coumaroylshikimic acid                    | LCMS                |                                                          |            | 3.88       | 319.15                         | Polar          | 2                  | No                    | Phenylpropanoid |
| 122 | UNK_Coumaroyl-hexose malic acid I             | LCMS                |                                                          |            | 5.44       | 441.18                         | Polar          | 2                  | No                    | Phenylpropanoid |
| 123 | UNK_Coumaroyl-hexose malic acid II            | LCMS                |                                                          |            | 5.66       | 441.18                         | Polar          | 2                  | No                    | Phenylpropanoid |
| 124 | UNK_p-Coumaroyl alcohol 4-O-glucoside         | LCMS                |                                                          |            | 4.88       | 311.12                         | Polar          | 2                  | No                    | Phenylpropanoid |
| 125 | Ferulic Acid                                  | LCMS                |                                                          |            | 6.15       | 193.06                         | Polar          | 1                  | Yes                   | Phenylpropanoid |
| 126 | Feruloyl-malate                               | LCMS                |                                                          |            | 6.01       | 309.14                         | Polar          | 1                  | Yes                   | Phenylpropanoid |
| 127 | Feruloylquinic acid (trans-5-FQA)             | LCMS                |                                                          |            | 4.36       | 367.11                         | Polar          | 2                  | No                    | Phenylpropanoid |
| 128 | Feruloylquinic acid (trans-4-FQA)             | LCMS                |                                                          |            | 4.75       | 367.11                         | Polar          | 2                  | No                    | Phenylpropanoid |
| 129 | UNK_Feruloyl coumaroyl caffeoyl shikimic acid | LCMS                |                                                          |            | 6.03       | 675.13                         | Polar          | 2                  | No                    | Phenylpropanoid |
| 130 | UNK_Sinapoyl malate                           | LCMS                |                                                          |            | 5.54       | 339.13                         | Polar          | 2                  | No                    | Phenylpropanoid |
| 131 | UNK_Sinapylalcohol                            | LCMS                |                                                          |            | 4.72       | 207.02                         | Polar          | 2                  | No                    | Phenylpropanoid |
| 132 | UNK_Syringin                                  | LCMS                |                                                          |            | 5.63       | 371.14                         | Polar          | 2                  | No                    | Phenylpropanoid |
| 133 | Kaempferol-diglucoside                        | LCMS                |                                                          |            | 3.90       | 609.15                         | Polar          | 2                  | No                    | Phenylpropanoid |
| 134 | Kaempferol-glucoside I                        | LCMS                |                                                          |            | 4.55       | 447.09                         | Polar          | 1                  | Yes                   | Phenylpropanoid |
| 135 | Kaempferol-glucoside II                       | LCMS                |                                                          |            | 4.88       | 447.10                         | Polar          | 1                  | Yes                   | Phenylpropanoid |
| 136 | Kaempferol-glucoside III                      | LCMS                |                                                          |            | 5.59       | 447.10                         | Polar          | 1                  | Yes                   | Phenylpropanoid |
| 137 | Kaempferol-rutinoside I                       | LCMS                |                                                          |            | 5.07       | 563.18                         | Polar          | 1                  | Yes                   | Phenylpropanoid |
| 138 | Kaempferol-rutinoside II                      | LCMS                |                                                          |            | 5.38       | 593.16                         | Polar          | 1                  | Yes                   | Phenylpropanoid |
| 139 | UNK_Kaempferol-malic acid glucoside           | LCMS                |                                                          |            | 6.02       | 563.16                         | Polar          | 2                  | No                    | Phenylpropanoid |
| 140 | Quercetin hexose malic acid                   | LCMS                |                                                          |            | 5.49       | 579.21                         | Polar          | 2                  | No                    | Phenylpropanoid |
| 141 | Quercetin malonyl glucoside                   | LCMS                |                                                          |            | 5.38       | 549.21                         | Polar          | 1                  | Yes                   | Phenylpropanoid |
| 142 | Rutin                                         | LCMS                |                                                          |            | 4.96       | 609.16                         | Polar          | 1                  | Yes                   | Phenylpropanoid |
| 143 | UNK_Quercetin malonyl glucoside               | LCMS                |                                                          |            | 5.56       | 549.20                         | Polar          | 2                  | No                    | Phenylpropanoid |
| 144 | Benzoic acid                                  | GCMS                | 9.74                                                     | 1248.5     |            |                                | Polar          | 1                  | Yes                   | Phenylpropanoid |
| 145 | Vanillic acid                                 | LCMS                |                                                          |            | 4.45       | 167.08                         | Polar          | 1                  | Yes                   | Phenylpropanoid |
| 146 | Veratric acid                                 | LCMS                |                                                          |            | 6.72       | 181.13                         | Polar          | 1                  | Yes                   | Phenylpropanoid |
|     |                                               |                     |                                                          |            |            |                                |                |                    |                       |                 |
